## **Implemented Interventions in Preventing Surgical Site Infection in Pediatric Appendicitis Patients: A Scoping Review**

Nutan B. Hebballi, BDS, MPH, PhD<sup>1</sup>, Krysta Sutyak, DO<sup>1</sup>, Maryam Broussard, MHA<sup>1</sup>, Caroline Doughty, RN<sup>1</sup>, Elisa Garcia, MPH, RN<sup>2</sup>, Kevin P. Lally, MD, MS<sup>1</sup>, Martin L. Blakely, MD, MS<sup>1</sup>, KuoJen Tsao, MD<sup>1</sup>

### **Affiliations:**

1. Department of Pediatric Surgery, McGovern Medical School at The University of Texas Health Science Center at Houston, Houston TX, USA
2. Division of Fetal Intervention, McGovern Medical School at The University of Texas Health Science Center at Houston, Houston, TX, USA

### **Corresponding Author :**

KuoJen Tsao, MD

6431 Fannin Street, MSB 5.256 Houston, TX 77030

Phone: 713-500-7300, Fax: 713-500-7296

[KuoJen.Tsao@uth.tmc.edu](mailto:KuoJen.Tsao@uth.tmc.edu)

**Funding:** This study did not receive any funding.

**Conflicts of interest:** The authors declare no conflict of interest related to this article.

## Abstract

**Objective:** Surgical site infections (SSIs), especially deep/organ-space SSIs, are common and serious complications following appendectomy. This review aimed to explore the interventions that have been implemented to reduce the risk of SSIs in pediatric appendicitis patients.

**Methods:** A literature search was performed using PubMed, Cochrane, and Embase databases of studies in English published between January 01, 1973, and April 30, 2023. Studies on pediatric patients ( $\leq 18$  years) with appendicitis that described any interventions aimed at reducing SSIs and reported SSIs as an outcome were included.

**Results:** A total of 56 studies were included in the final scoping review. The interventions included antibiotic stewardship, clinical practice guidelines/pathways, different surgical approaches, timing of appendectomy, irrigation or lavage, use of peritoneal drains, timing of wound closure and management, parenteral nutrition, pain management, and outpatient management.

**Conclusion:** A wide variety of interventions have been studied in pediatric appendicitis patients to reduce the SSI rates. Very few publications have studied low-cost, widely available intraoperative interventions to reduce deep/organ-space SSIs.

**Keywords:** Surgical Site Infection, Pediatric, Appendicitis, Appendectomy; Intervention, Prevention

## Introduction

Acute appendicitis is the most common gastrointestinal disorder affecting children requiring urgent surgical treatment in the United States (US)<sup>1</sup>. Approximately 80,000 children undergo appendectomy annually, and the average cost of surgical care is estimated to be \$9,000 per patient<sup>2</sup>. Approximately 30% of acute appendicitis patients present with perforated appendicitis, ranging from 20% to 74%<sup>3,4</sup>. The rate of perforated appendicitis is higher in younger patients<sup>3,4</sup>. In children, perforated appendicitis is associated with post-surgical complications such as wound infections, intra-abdominal abscesses, emergency department visits, hospital readmissions, and extended hospital stay<sup>4,5</sup>.

Surgical site infections (SSIs) are serious postoperative complications that affect 2% of surgical procedures, with varying rates depending upon the surgery type<sup>6</sup>. Typically, surgical wounds are categorized as clean, clean/contaminated, contaminated, and dirty depending upon the bacterial load, and this classification can be used as a predictor of the incidence of SSI for a given surgery<sup>7</sup>. SSIs are the most common complication in children following surgery, resulting in increased morbidity, mortality, additional procedures, longer length of hospital stay, and significant healthcare costs and burdens despite prevention strategies<sup>8-10</sup>. In pediatric patients, intra-abdominal abscess (also called deep/organ-space surgical site infection) occurs in 10-25% of the patients<sup>11</sup>.

Many strategies, guidelines, and pathways have been proposed to reduce the risk of developing SSIs in pediatric appendicitis and other conditions. These efforts can be aided by implementing a care bundle<sup>12</sup>, utilizing a combination of practices such as antiseptics and prophylactic antibiotics, intraoperative interventions, and postoperative care details<sup>13</sup>. Our baseline impression is that few published studies have focused on widely available, low-cost, intraoperative interventions to reduce deep/organ-space SSIs with perforated appendicitis in children. Most publications likely focus on different antibiotic interventions. In this scoping review, we present the current evidence regarding interventions that have been studied to reduce SSIs in children following appendectomy.

## Methods

### *Search strategy*

The electronic search was conducted using PubMed, Cochrane, and Embase databases for articles published between January 01, 1973, and April 30, 2023. The inclusion criteria were randomized controlled trials (RCT), observational cohort studies, and interventional (pre-post) studies; pediatric appendicitis patients ( $\leq 18$  years); studies that reported SSI as an outcome; and English language. Studies that described SSI as a wound complication, wound infection, postoperative infection, intra-abdominal abscess, or organ space infection were included. We did not distinguish the type of SSI, such as superficial, deep, organ/space infection, or intra-abdominal abscess. Exclusion criteria were case reports, case series, narrative and systematic reviews, unavailability of full-text, non-English language, microbiological reporting of SSI, and other concurrent surgery performed with appendectomy procedure. Search terms included: “appendicitis”, “appendicitis management”, “appendectomy”, “intervention”, “prevent\*”, “surgical site infection”, “SSI”, “wound infection”, “postoperative complication”, “post-operative complication”.

### *Study selection*

Study selection was completed in two stages. In the first stage, four authors (NH, MB, CD, EG) were divided into two groups, and the titles and abstracts were screened based on the predefined eligibility criteria. In the second stage, articles that appeared pertinent and those with insufficient evidence were included for full-text review and were reviewed by four authors (NH, MB, CD, KS). Discrepancies were resolved through discussions.

### *Data extraction and quality assessment*

Data from included studies were retrieved and stored in the institutional REDCap<sup>14</sup>, a password-protected secured web database. Extracted data included first author, year of publication, country of publication, study type (single-center or multi-center), study design, intervention details, sample size, whether the SSI was listed as the primary or the secondary outcome, results of SSI and the associated p-values. Based on the interventions described in the study, they were further categorized into subsections that included antibiotic stewardship, clinical practice guidelines/pathways, different surgical approaches, timing of the appendectomy procedure, irrigation or lavage, use of peritoneal drains, timing of wound closure and management, parenteral nutrition, pain management using ketorolac and outpatient management of patients post appendectomy.

## **Results**

### *Search Results*

We retrieved 8178 articles from the three database searches, and after removing duplicate records, 6134 articles were screened for titles and abstracts. After this screening, 99 articles were retrieved for full-text reviews, of which six were not found, and 37 were excluded for multiple reasons (Figure 1). Finally, 56 articles met the inclusion criteria and were included in the qualitative analysis (Figure 1).

### *Characteristics of included studies*

The main characteristics of all 56 articles are presented in Table 1. Thirty-three studies were performed in the US, 5 studies in Japan, 4 studies in the United Kingdom, 4 studies in Turkey, 2 studies each in Hong Kong and South Africa, and one study each in Australia, Canada, France, Iran, South Korea and Sweden (Table 1). Forty-five studies were single-center, and the remaining 11 were multi-center (Table 1). Regarding study design, 13 were randomized control trials, 5 were prospective cohort studies, 27 were retrospective cohort studies, and 11 were pre-post studies (Table 1). There were 18 studies on antibiotic stewardship, 12 studies each on clinical practice guidelines/pathways and surgical approach, 4 studies on the timing of appendectomy procedure, 3 studies on irrigation or lavage, two studies each on the use of peritoneal drains and timing of wound management and closure and one studies each on parenteral nutrition, pain management using ketorolac and outpatient management after appendectomy (Table 1).

### *Results of individual studies and description of interventions*

Evidence from each of the included studies is presented narratively below and in the evidence table (Table 2) according to the intervention types.

### ***Antibiotic stewardship***

There is considerable variation in antibiotic therapy regarding the choice, duration, timing, route of administration, and discharge of patients at home with or without antibiotics for acute appendicitis management. Seven studies<sup>15-21</sup> used a combination of antibiotic regimens to reduce the occurrence of SSIs following the appendectomy procedure. Cameron et al. compared the effectiveness of piperacillin/tazobactam (extended-spectrum) vs. cefoxitin or ceftriaxone with metronidazole (narrow spectrum) and found the SSI rates to be similar<sup>15</sup>. Likewise, when ertapenem was compared to the standard triple antibiotic therapy (ampicillin, gentamicin, and metronidazole), Dalgic et al. found no differences in SSIs<sup>16</sup>. Foster et al. compared the effectiveness of sulbactam and ampicillin vs. metronidazole and cefotaxime; they showed no differences in SSIs<sup>17,18</sup>. Hutchinson et al. showed no significant difference in the incidence or severity of wound infection or post-operative intra-abdominal sepsis between the metronidazole-treated and placebo groups<sup>19</sup>. A combination of ceftriaxone and metronidazole was superior in reducing SSIs compared to cefoxitin alone, according to Kashtan et al.<sup>21</sup>.

Antibiotics were administered at different points in time during the patient's care in the hospital and at discharge. Cramm et al. found no significant difference in the SSI rates after redosing cefoxitin, ceftriaxone combined with metronidazole, and piperacillin-tazobactam within one hour of the appendectomy procedure<sup>22</sup>. None of the patients had wound infection or intra-abdominal abscess with or without administration of ornidazole, penicillin plus tobramycin, and piperacillin prophylactically, as reported by Kizilcan et al.<sup>23</sup>. In another study by Seddik et al., no significant differences were noted in SSI rates after reducing piperacillin and tazobactam use<sup>24</sup>. No differences in SSI or intra-abdominal abscesses were reported when antibiotics were administered within one hour before incision, as noted by Litz et al.<sup>25</sup>. Similar observations were made by Tsang et al. when patients were administered either a single preoperative dose of gentamicin and metronidazole or three doses of gentamicin and metronidazole given before and after the operation<sup>26</sup>. Somers et al. noted that the timing and duration of preoperative and postoperative antibiotics (piperacillin-tazobactam or ciprofloxacin and metronidazole (in allergy) did not impact SSI rates<sup>27</sup>. Moreover, administration of a combination of ceftriaxone and metronidazole vs. anti-pseudomonal antibiotics within the first two days after admission or 10 days of intravenous ertapenem alone or converted to oral amoxicillin-clavulanate did not affect the SSI rates<sup>28,29</sup>. However, two studies by Mennie et al. and Nadler et al. noted that two doses of intravenous cephazolin and metronidazole reduced the occurrence of wound infection significantly<sup>30</sup> and using a multi-drug therapy of ampicillin, gentamicin, clindamycin, or metronidazole increased the occurrence of SSIs when compared to monotherapy (piperacillin-tazobactam)<sup>20</sup>. Anderson et al. reported that patients discharged home had significantly higher SSIs than patients without antibiotics at discharge<sup>31</sup>. In contrast, post-discharge antibiotics did prevent the development of superficial, deep, or organ space infections in post-appendectomy patients, according to Jen et al.<sup>32</sup>

### ***Clinical practice guidelines/pathways***

Various clinical practice guidelines (CPG) or clinical pathways were studied to reduce SSI following appendectomy. Two studies examined the effect of same-day discharge CPG, and no significant reduction in SSIs was observed before or after implementation<sup>33,34</sup>. However,

Putnam et al. found a significant reduction in SSI during their first audit but returned to their usual rates<sup>34</sup>. Two studies that utilized CPGs to discontinue antibiotics had conflicting results. Theodorou et al. found higher post-discharge SSI rates; however, this increase in SSIs was not affected by CPG compliance<sup>35</sup>. In contrast, no significant differences in SSIs between the pre-protocol and post-protocol groups were reported by Rossidis et al.<sup>36</sup>. While the selection of preoperative/postoperative antibiotics varied, its duration did not significantly affect SSI rates<sup>11,37,38</sup>. However, the timing of antibiotics administration was significantly associated with SSIs<sup>38</sup>. Two studies that focused on implementing a combination of hospital-wide antimicrobial stewardship programs and CPG on antimicrobial utilization and changing the triple antibiotic (ampicillin, gentamycin, and metronidazole) to the single agent (amoxicillin/clavulanic acid) demonstrated a significant reduction in SSI rates<sup>39,40</sup>. In three studies that focused their CPGs on the assessment and management of appendicitis preoperatively and postoperatively, including blood work, imaging requirements, and streamlining of care orders sets<sup>41-43</sup>, only Khan et al. reported a significant reduction in SSI rates in the post CPG implementation cohort<sup>42</sup>.

### ***Surgical approach***

In pediatric patients, two operative modalities, namely open appendectomy and laparoscopic appendectomy, have been widely used for the management of appendicitis. Of the six studies<sup>44-49</sup> that compared the SSI rates between open appendectomy and laparoscopic appendectomy, four of them found laparoscopic appendectomy had a significantly lower risk of developing SSIs compared to open appendectomy<sup>45,47-49</sup>. In contrast, two studies<sup>44,46</sup> found no statistically significant association between the operative techniques (open/laparoscopic appendectomy) and SSIs.

Other surgical modalities, such as single-port, multi-port laparoscopic appendectomy, and transumbilical laparoscopic assisted appendectomy, were also studied<sup>50-52</sup>. Han et al. compared the hybrid appendectomy (HA), single port laparoscopic appendectomy (SPLA), and multiport laparoscopic appendectomy (MPLA). They found that wound-related complications such as wound infection and wound seroma were higher in the HA and SPLA groups than in the MPLA group<sup>50</sup>. However, it did not meet statistical significance ( $p=0.245$ )<sup>50</sup>. Similarly, one patient in the HA group has SSI, while no patients developed SSIs in a study that compared the intracorporeal hybrid single port vs. conventional laparoscopic appendectomy<sup>53</sup>. In a feasibility study of single-incision pediatric endosurgery for treating appendicitis, Lacher et al. observed that 11 patients and 13 patients developed wound infection and intra-abdominal abscesses, respectively<sup>54</sup>. Furthermore, two studies found a conflicting result for SSI rates when the transumbilical laparoscopically assisted appendectomy (TULA) was compared with conventional 3-port laparoscopic (TPLA), laparoscopic appendectomy, and open appendectomy. Karam et al. found no statistically significant ( $p=0.19$ )<sup>51</sup>, but Vejdani et al. demonstrated that TULA was associated with lower wound infection ( $p=0.0035$ )<sup>52</sup>. Lastly, in another study, there was no significant difference in rates of SSI when the endoloop versus endostapler technique was used for the closure of the appendiceal stump<sup>55</sup>.

### ***Timing of appendectomy***

Given the emergent nature of acute appendicitis in children, urgent appendectomy is the recognized course of treatment in the United States<sup>56</sup>. However, a few studies assessed the relationship between the effect of time on appendectomy and the risk of developing SSIs in children. A study by Blakely et al. compared early appendectomy with interval appendectomy

after 6 to 8 weeks and found that patients treated with interval appendectomy were significantly more likely to develop an intra-abdominal abscess ( $p=0.02$ ) with no significant differences for wound infection ( $p=0.91$ )<sup>57</sup>. Similarly, Gurien et al. found no significant differences in SSI in the nonperforated delayed vs. immediate group ( $p=0.96$ )<sup>58</sup>. Additionally, the time to appendectomy and time from diagnosis of appendicitis to the appendectomy operation did not increase the risk of developing SSI in simple and complicated appendicitis<sup>59,60</sup>.

### ***Irrigation or lavage***

To minimize the risk of developing SSI, irrigation has been investigated as a technique to remove residual peritoneal abscess residue in perforated appendicitis. However, the effectiveness of peritoneal irrigation or lavage has been debatable<sup>61</sup>. In our review, we found mixed results, where the incidence of SSI was significantly lower in patients irrigated with strong acid-electrolyzed water (0% vs. 20%, respectively ( $p<0.05$ ) compared to saline alone<sup>62</sup> and children with perforated appendicitis who underwent peritoneal lavage with saline had a lower occurrence of superficial wound infection as compared to those who underwent appendectomy with silicon tube drainage<sup>63</sup>. On the contrary, the rate of wound infection did not differ between the group of pediatric patients who were treated with preoperative intravenous doses of metronidazole and cefuroxime as an adjunct to oxytetracycline lavage vs. oxytetracycline lavage alone in non-perforated appendicitis<sup>64</sup>.

### ***Use of peritoneal drains***

The use of a peritoneal drain in complicated appendicitis patients is controversial, given that they pose a significant risk of developing postoperative complications such as wound infection or intra-abdominal abscess<sup>47</sup>. However, in a study conducted by Fujushiro et al., drain placement was not associated with an incidence of superficial SSI (5.5% vs. 7.6%,  $p=0.113$ ) and organ space SSI (9.0% vs. 8.7%,  $p=0.893$ ) in pediatric complicated appendicitis patients<sup>65</sup>. In another study, 15.7% of the 70 patients and 7.5% of the 40 patients developed SSI when treated with Penrose drain and Jackson Pratt drain, respectively, in pediatric perforated appendicitis patients<sup>66</sup>.

### ***Timing of wound closure and management***

Wound infection is a common complication in children with perforated or gangrenous appendicitis and those who undergo open appendectomy<sup>67,68</sup>. Tsang et al. assessed the effect of immediate wound closure and delayed wound closure with skin tape in a prospective study of 63 children undergoing emergency appendectomy and found no significant difference in the incidence of wound infection in perforated appendicitis patients (21% vs. 24%)<sup>69</sup>. In another study, Kato et al. used a Lapprotector, a protective film, and a device to safeguard the open appendectomy wound to prevent infection. They did not find any significant differences in patients with perforated and nonperforated appendicitis patients<sup>70</sup>. However, it was significant in protecting against wound infection in patients with perforated appendicitis ( $p<0.05$ ), suggesting the use of Lapprotector while performing open appendectomy procedures in perforated appendicitis cases<sup>70</sup>.

### ***Outpatient management after appendectomy***

Several studies have demonstrated that it is safe to discharge patients home the same day after undergoing appendectomy without long-term consequences that help save healthcare cost<sup>71-</sup>

<sup>73</sup>. An analysis of 154 institutional patients and 4973 patients from the American College of Surgeons, National Surgical Quality Improvement Program-Pediatric (NSQIP-P) database demonstrated that there were no significant differences in the superficial ( $p=0.02$ ), deep ( $p=0.17$ ) and organ/space surgical site infections ( $p=0.31$ ) when pediatric uncomplicated appendicitis patients were managed either in the emergency department under observation status or were transferred to the perioperative area without the need for an inpatient hospital admission<sup>74</sup>.

### ***Parenteral nutrition***

Studies have shown that there is variability in care and resource utilization in children with complicated appendicitis<sup>75,76</sup>. One such variation is in the utilization of parenteral nutrition in complicated appendicitis patients, which can be attributable to the surgeon's perceptions about parenteral nutrition's utility in postoperative recovery, wound healing, and immune function, especially in children with increased metabolic needs due to sepsis or inflammatory response<sup>76,77</sup>. However, no significant differences were noted between patients treated at high versus low parenteral nutrition utilization hospitals for SSIs (11.3% vs. 8.8%, OR: 0.72 [95% CI: 0.40, 1.32],  $p = 0.29$ ) after matching patients on sex, age, race, payor, body mass index and postoperative hospital length of stay based on the 29 hospitals participating in the NSQIP-Pediatric Appendectomy Pilot Collaborative<sup>77</sup>.

### ***Pain Management***

Ketorolac is a well-known non-steroidal anti-inflammatory drug that the FDA has approved for management of acute pain<sup>78</sup>. In adults, ketorolac can cause complications such as increased emergency department visits and a higher rate of readmission when used for pain management after undergoing gastrointestinal surgeries<sup>79</sup>. However, in pediatric patients, administration of ketorolac on the day of or a day after the appendectomy procedure was not associated with readmission with intra-abdominal postoperative infection within 30 days ( $p=0.14$ )<sup>80</sup>. Thus, Naseem et al. recommend using ketorolac during the perioperative period in pediatric appendectomy patients based on their analysis of 78 296 pediatric patients data from the pediatric health information system<sup>80</sup>.

### ***Discussion***

Our comprehensive scoping review was aimed at identifying interventions that have been studied to reduce SSIs in children after appendectomy for acute appendicitis. In our over fifty years (1973-2023) review, we found 56 studies conducted to prevent SSIs after appendectomy in children. These SSI reduction interventions included changes in the combination, duration, and timing of antibiotics, implementation or modifications to the clinical practice guidelines/ clinical pathways, use of different types of surgical approaches, timing of appendectomy procedure, irrigation or lavage, use of peritoneal drains, timing of wound closure and management, parenteral nutrition, pain management using ketorolac and outpatient management of patients after appendectomy.

Given the significant toll of SSIs on patients, hospitals, and the US healthcare system, several guidelines for preventing, detecting, and managing SSIs have been published previously<sup>81,82</sup>. In 2016, the American College of Surgeons (ACS) and Surgical Infection Society published SSI prevention and management guidelines, including prehospital, hospital, and post-discharge interventions for abdominal surgery<sup>83</sup>. Our scoping review identified interventions



such as antibiotic stewardship, wound protection, closure, and care that were grouped under hospital interventions in the ACS and Surgical Infection Society's guidelines.

Our scoping review has some limitations. The scoping reviews have inherent limitations of presenting breadth rather than depth of information on a particular topic. However, our research objective was to map out the current evidence in the literature; thus, this methodology was appropriate. For our scoping review, we did not limit to certain types of appendicitis, such as simple, complicated, gangrenous, or perforated appendicitis. Nonetheless, the interventions we described here have been utilized for reducing SSIs regardless of the type of appendicitis. Lastly, we included studies published in English only due to the vast number of included studies. Thus, our results are generalizable to only published articles written in English. Future studies should focus on assessing these interventions' long-term implementation, compliance, and cost-effectiveness.

Despite these limitations, our scoping review fills an important gap in the existing pediatric surgical literature by organizing a wide range of studied interventions of evidence-based practices that can be adopted to prevent SSIs in pediatric appendicitis patients.

## **Conclusion**

In pediatric appendicitis patients, a wide variety of evidence-based interventions have been implemented to prevent SSIs following appendectomy. The effectiveness of the studied interventions varied greatly. Most prior interventions focus on antibiotic considerations, and very few intraoperative interventions have been studied appropriately. Despite these interventions, SSI rates remain high in children, necessitating further investigations. Pediatric surgeons should be cognizant of the implications of SSIs on their patient's health and on the healthcare system, monitor their own practices, and adopt the interventions that are feasible to prevent occurrences of SSIs.

## References

1. Guthery SL, Hutchings C, Dean JM, Hoff C. National estimates of hospital utilization by children with gastrointestinal disorders: analysis of the 1997 kids' inpatient database. *J Pediatr*. 2004;144(5):589-594. doi:10.1016/j.jpeds.2004.02.029
2. Salvi PS, Cowles RA, Oh PS, Solomon DG. Variability in pediatric appendectomy: The association between disposable supply cost and procedure duration. *Surgery*. 2022;172(2):729-733. doi:https://doi.org/10.1016/j.surg.2022.04.006
3. Halaseh SA, Kostalas M, Kopec CA, Nimer A. Single-Center Retrospective Analysis of Neutrophil, Monocyte, and Platelet to Lymphocyte Ratios as Predictors of Complicated Appendicitis. *Cureus*. 2022;14(9):e29177. doi:10.7759/cureus.29177
4. Ribeiro AM, Romero I, Pereira CC, et al. Inflammatory parameters as predictive factors for complicated appendicitis: A retrospective cohort study. *Ann Med Surg*. 2022;74:103266. doi:10.1016/j.amsu.2022.103266
5. Gosain A, Williams RF, Blakely ML. Distinguishing acute from ruptured appendicitis preoperatively in the pediatric patient. *Adv Surg*. 2010;44:73-85. doi:10.1016/j.yasu.2010.05.021
6. de Lissovoy G, Fraeman K, Hutchins V, Murphy D, Song D, Vaughn BB. Surgical site infection: incidence and impact on hospital utilization and treatment costs. *Am J Infect Control*. 2009;37(5):387-397. doi:10.1016/j.ajic.2008.12.010
7. Alganabi M, Biouss G, Pierro A. Surgical site infection after open and laparoscopic surgery in children: a systematic review and meta-analysis. *Pediatr Surg Int*. 2021;37(8):973-981. doi:10.1007/s00383-021-04911-4
8. Bert F, Giacomelli S, Amprino V, et al. The "bundle" approach to reduce the surgical site infection rate. *J Eval Clin Pract*. 2017;23(3):642-647. doi:10.1111/jep.12694
9. Khoshbin A, So JP, Aleem IS, Stephens D, Matlow AG, Wright JG. Antibiotic Prophylaxis to Prevent Surgical Site Infections in Children: A Prospective Cohort Study. *Ann Surg*. 2015;262(2):397-402.
10. Owens CD, Stoessel K. Surgical site infections: epidemiology, microbiology and prevention. *J Hosp Infect*. 2008;70 Suppl 2:3-10. doi:10.1016/S0195-6701(08)60017-1
11. Wakeman D, Livingston MH, Levatino E, et al. Reduction of surgical site infections in pediatric patients with complicated appendicitis: Utilization of antibiotic stewardship principles and quality improvement methodology. *J Pediatr Surg*. 2022;57(1):63-73. doi:10.1016/j.jpedsurg.2021.09.031
12. Ching PR. Care Bundles in Surgical Site Infection Prevention: A Narrative Review. *Curr Infect Dis Rep*. Published online 2024. doi:10.1007/s11908-024-00837-9
13. Koumu MI, Jawhari A, Alghamdi SA, Hejazi MS, Alturaif AH, Aldaqal SM. Surgical Site Infection Post-appendectomy in a Tertiary Hospital, Jeddah, Saudi Arabia. *Cureus*. 2021;13(7):e16187. doi:10.7759/cureus.16187

14. Harris PA, Taylor R, Thielke R, Payne J, Gonzalez N, Conde JG. Research electronic data capture (REDCap)—A metadata-driven methodology and workflow process for providing translational research informatics support. *J Biomed Inform.* 2009;42(2):377-381. doi:<https://doi.org/10.1016/j.jbi.2008.08.010>
15. Cameron DB, Melvin P, Graham DA, et al. Extended Versus Narrow-spectrum Antibiotics in the Management of Uncomplicated Appendicitis in Children. *Ann Surg.* 2018;268(1):186-192. doi:10.1097/SLA.0000000000002349
16. Dalgic N, Karadag C, Bayraktar B, et al. Ertapenem versus Standard Triple Antibiotic Therapy for the Treatment of Perforated Appendicitis in Pediatric Patients: A Prospective Randomized Trial. *Eur J Pediatr Surg.* 2013;24(05):410-418. doi:10.1055/s-0033-1352524
17. Foster MC, Kapila L, Morris DL, Slack RCB. A Randomized Comparative Study of Sulbactam plus Ampicillin vs, Metronidazole plus Cefotaxime in the Management of Acute Appendicitis in Children. *Clin Infect Dis.* 1986;8(Supplement\_5):S634-S638. doi:10.1093/clinids/8.Supplement\_5.S634
18. Foster MC, Morris DL, Legan C, Kapila L, Slack RC. Perioperative prophylaxis with sulbactam and ampicillin compared with metronidazole and cefotaxime in the prevention of wound infection in children undergoing appendectomy. *J Pediatr Surg.* 1987;22(9 CC-Anaesthesia CC-Child Health CC-Colorectal CC-Wounds):869-872. doi:10.1016/s0022-3468(87)80658-9
19. Hutchinson GH, Patel BG, Doig CM. A double-blind controlled trial of metronidazole suppositories in children undergoing appendicectomy. *Curr Med Res Opin.* 1983;8(6):441-445. doi:10.1185/03007998309111751
20. Nadler EP, Reblock KK, Ford HR, Gaines BA. Monotherapy versus multi-drug therapy for the treatment of perforated appendicitis in children. *Surg Infect (Larchmt).* 2003;4(4):327-333. doi:10.1089/109629603322761382
21. Kashtan MA, Graham DA, Melvin P, et al. Ceftriaxone Combined With Metronidazole is Superior to Cefoxitin Alone in the Management of Uncomplicated Appendicitis in Children. *Ann Surg.* 2021;274(6):e995-e1000. doi:10.1097/SLA.0000000000003704
22. Cramm SL, Chandler NM, Graham DA, et al. Association Between Antibiotic Redosing Before Incision and Risk of Incisional Site Infection in Children With Appendicitis. *Ann Surg.* 2023;278(4):e863-e869. doi:10.1097/SLA.0000000000005747
23. Kizilcan F, Tanyel FC, Büyükpamukçu N, Hiçsönmez A. The necessity of prophylactic antibiotics in uncomplicated appendicitis during childhood. *J Pediatr Surg.* 1992;27(5 CC-Child Health CC-Colorectal CC-Wounds):586-588. doi:10.1016/0022-3468(92)90453-e
24. Seddik TB, Rabsatt LA, Mueller C, et al. Reducing Piperacillin and Tazobactam Use for Pediatric Perforated Appendicitis. *J Surg Res.* 2021;260:141-148. doi:10.1016/j.jss.2020.11.067
25. Litz CN, Asuncion JB, Danielson PD, Chandler NM. Timing of antimicrobial prophylaxis

- and infectious complications in pediatric patients undergoing appendectomy. *J Pediatr Surg*. 2018;53(3):449-451. doi:10.1016/j.jpedsurg.2017.05.005
26. Tsang TM, Tam PK, Saing H. Antibiotic prophylaxis in acute non-perforated appendicitis in children: single dose of metronidazole and gentamicin. *J R Coll Surg Edinb*. 1992;37(2 CC-Child Health CC-Wounds):110-112. <https://www.cochranelibrary.com/central/doi/10.1002/central/CN-00085119/full>
  27. Somers KK, Eastwood D, Liu Y, Arca MJ. Splitting hairs and challenging guidelines: Defining the role of perioperative antibiotics in pediatric appendicitis patients. *J Pediatr Surg*. 2020;55(3):406-413. doi:10.1016/j.jpedsurg.2019.07.004
  28. Hamdy RF, Handy LK, Spyridakis E, et al. Comparative Effectiveness of Ceftriaxone plus Metronidazole versus Anti-Pseudomonal Antibiotics for Perforated Appendicitis in Children. *Surg Infect (Larchmt)*. 2019;20(5):399-405. doi:10.1089/sur.2018.234
  29. Arnold MR, Wormer BA, Kao AM, et al. Home intravenous versus oral antibiotics following appendectomy for perforated appendicitis in children: a randomized controlled trial. *Pediatr Surg Int*. 2018;34(12 CC-Wounds):1257-1268. doi:10.1007/s00383-018-4343-0
  30. Mennie N, Panabokke G, Chang A, et al. Are Postoperative Intravenous Antibiotics Indicated After Laparoscopic Appendectomy for Simple Appendicitis? A Prospective Double-blinded Randomized Controlled Trial. *Ann Surg*. 2020;272(2):248-252. doi:10.1097/SLA.0000000000003732
  31. Anderson TK, Bartz-Kurycki MA, Kawaguchi AL, et al. Home Antibiotics at Discharge for Pediatric Complicated Appendicitis: Friend or Foe? *J Am Coll Surg*. 2018;227(2):247-254. doi:10.1016/j.jamcollsurg.2018.04.004
  32. Jen J, Hwang R, Mattei P. Post-discharge antibiotics do not prevent intra-abdominal abscesses after appendectomy in children. *J Pediatr Surg*. 2023;58(2):258-262. doi:10.1016/j.jpedsurg.2022.10.024
  33. Devin CL, D'Cruz R, Linden AF, et al. Reducing resource utilization for patients with uncomplicated appendicitis through use of same-day discharge and elimination of postoperative antibiotics. *J Pediatr Surg*. 2020;55(12):2591-2595. doi:10.1016/j.jpedsurg.2020.04.003
  34. Putnam LR, Levy SM, Johnson E, et al. Impact of a 24-hour discharge pathway on outcomes of pediatric appendectomy. *Surgery*. 2014;156(2):455-461. doi:10.1016/j.surg.2014.03.030
  35. Theodorou CM, Lee SY, Lawrence Y, Saadai P, Hirose S, Brown EG. The Utility of Discharge Antibiotics in Pediatric Perforated Appendicitis Without Leukocytosis. *J Surg Res*. 2022;275:48-55. doi:10.1016/j.jss.2022.01.024
  36. Rossidis AC, Brown EG, Payton KJ, Mattei P. Implementation of an evidence-based protocol after appendectomy reduces unnecessary antibiotics. *J Pediatr Surg*. 2020;55(11):2379-2386. doi:10.1016/j.jpedsurg.2020.07.001
  37. Ferguson DM, Ferrante AB, Orr HA, et al. Clinical Practice Guideline Nonadherence and

- Patient Outcomes in Pediatric Appendicitis. *J Surg Res.* 2021;257:135-141.  
doi:10.1016/j.jss.2020.07.042
38. Mueck KM, Putnam LR, Anderson KT, Lally KP, Tsao K, Kao LS. Does compliance with antibiotic prophylaxis in pediatric simple appendicitis matter? *J Surg Res.* 2017;216:1-8.
  39. Willis ZI, Duggan EM, Gillon J, Blakely ML, Di Pentima MC. Improvements in Antimicrobial Prescribing and Outcomes in Pediatric Complicated Appendicitis. *Pediatr Infect Dis J.* 2018;37(5):429-435. doi:10.1097/INF.0000000000001816
  40. van Coller R, Arnold M, le Roux H, et al. Amoxicillin/Clavulanic acid monotherapy in complicated paediatric appendicitis: Good enough? *J Pediatr Surg.* 2022;57(6):1115-1118. doi:10.1016/j.jpedsurg.2022.01.032
  41. Lam JY, Beaudry P, Simms BA, Brindle ME. Impact of implementing a fast-track protocol and standardized guideline for the management of pediatric appendicitis. *Can J Surg.* 2021;64(4):E364-E370. doi:10.1503/cjs.005420
  42. Khan S, Siow VS, Lewis A, et al. An Evidence-Based Care Protocol Improves Outcomes and Decreases Cost in Pediatric Appendicitis. *J Surg Res.* 2020;256:390-396. doi:10.1016/j.jss.2020.05.067
  43. Willis ZI, Duggan EM, Bucher BT, et al. Effect of a Clinical Practice Guideline for Pediatric Complicated Appendicitis. *JAMA Surg.* 2016;151(5):e160194. doi:10.1001/jamasurg.2016.0194
  44. Akkary R, Zeidan S, Matta R, Lakis C, Diab N. Pediatric appendectomy in developing countries. *Int J Pediatr Adolesc Med.* 2020;7(2):70-73. doi:10.1016/j.ijpam.2019.06.006
  45. Botchway E, Marcisz L, Schoeman H, Kofi Botchway PP, Mabitsela EM, Tshifularo N. Laparoscopic versus open appendectomy: A retrospective cohort study on the management of acute appendicitis (simple and complicated) in children under 13 years of age. *Afr J Paediatr Surg.* 2021;18(4):182-186. doi:[http://dx.doi.org/10.4103/ajps.AJPS\\_102\\_20](http://dx.doi.org/10.4103/ajps.AJPS_102_20)
  46. Fujishiro J, Watanabe E, Hirahara N, et al. Laparoscopic Versus Open Appendectomy for Acute Appendicitis in Children: a Nationwide Retrospective Study on Postoperative Outcomes. *J Gastrointest Surg.* 2021;25(4):1036-1044. doi:10.1007/s11605-020-04544-3
  47. Groves LB, Ladd MR, Gallaher JR, et al. Comparing the cost and outcomes of laparoscopic versus open appendectomy for perforated appendicitis in children. *Am Surg.* 2013;79(9):861-864.
  48. Li P, Han Y, Yang Y, et al. Retrospective review of laparoscopic versus open surgery in the treatment of appendiceal abscess in pediatric patients. *Medicine (Baltimore).* 2017;96(30):e7514. doi:10.1097/MD.00000000000007514
  49. Omling E, Salö M, Saluja S, et al. A Nationwide Cohort Study of Outcome after Pediatric Appendicitis. *Eur J Pediatr Surg.* 2021;31(02):191-198. doi:10.1055/s-0040-1712508
  50. Han J, Kim H, Han SH, Kang BM. Hybrid Appendectomy in Pediatric Appendicitis: A Comparative Analysis of Single-Port and Multiport Laparoscopic Appendectomy. *J*

- Laparoendosc Adv Surg Tech.* 2022;32(3):330-335. doi:10.1089/lap.2021.0625
51. Karam PA, Mohan A, Buta MR, Seifarth FG. Comparison of Transumbilical Laparoscopically Assisted Appendectomy to Conventional Laparoscopic Appendectomy in Children. *Surg Laparosc Endosc Percutan Tech.* 2016;26(6):508-512. doi:10.1097/SLE.0000000000000334
  52. Vejdani SAK, Khosravi M, Amirian Z. Transumbilical laparoscopic-assisted appendectomy as a safe procedure for pediatric uncomplicated appendicitis: a comparison with laparoscopic and open appendectomy in a randomized clinical trial. *J Pediatr Endosc Surg.* 2021;3(1):39-46. doi:10.1007/s42804-020-00087-1
  53. Karam PA, Hiuser A, Magnuson D, Seifarth FGF. Intracorporeal hybrid single port vs conventional laparoscopic appendectomy in children. *La Pediatr Medica e Chir.* 2016;38(3):89-92. doi:10.4081/pmc.2016.133
  54. Lacher M, Muensterer OJ, Yannam GR, et al. Feasibility of Single-Incision Pediatric Endosurgery for Treatment of Appendicitis in 415 Children. *J Laparoendosc Adv Surg Tech.* 2012;22(6):604-608. doi:10.1089/lap.2012.0107
  55. Safavi A, Langer M, Skarsgard E. Endoloop versus endostapler closure of the appendiceal stump in pediatric laparoscopic appendectomy. *Can J Surg.* 2012;55(1):37-40. doi:10.1503/cjs.023810
  56. Warner BW, Kulick RM, Stoops MM, Mehta S, Stephan M, Kotagal UR. An evidenced-based clinical pathway for acute appendicitis decreases hospital duration and cost. *J Pediatr Surg.* 1998;33(9):1371-1375. doi:10.1016/s0022-3468(98)90010-0
  57. Blakely ML, Williams R, Dassinger MS, et al. Early vs Interval Appendectomy for Children With Perforated Appendicitis. *Arch Surg.* 2011;146(6):660. doi:10.1001/archsurg.2011.6
  58. Gurien LA, Wyrick DL, Smith SD, Dassinger MS. Optimal timing of appendectomy in the pediatric population. *J Surg Res.* 2016;202(1):126-131. doi:10.1016/j.jss.2015.12.045
  59. Boomer LA, Cooper JN, Deans KJ, et al. Does delay in appendectomy affect surgical site infection in children with appendicitis? *J Pediatr Surg.* 2014;49(6):1026-1029. doi:10.1016/j.jpedsurg.2014.01.044
  60. Boomer LA, Cooper JN, Anandalwar S, et al. Delaying Appendectomy Does Not Lead to Higher Rates of Surgical Site Infections. *Ann Surg.* 2016;264(1):164-168. doi:10.1097/SLA.0000000000001396
  61. Nataraja R, Panabokke G, Chang A, et al. Does Peritoneal Lavage Influence the Rate of Complications Following Pediatric Laparoscopic Appendectomy in Children with Complicated Appendicitis? A Prospective Randomized Clinical Trial. *J Pediatr Surg.* 2019;54. doi:10.1016/j.jpedsurg.2019.08.039
  62. Kubota A, Goda T, Tsuru T, et al. Efficacy and safety of strong acid electrolyzed water for peritoneal lavage to prevent surgical site infection in patients with perforated appendicitis. *Surg Today.* 2015;45(7 CC-Wounds):876-879. doi:10.1007/s00595-014-1050-x

63. Toki A, Ogura K, Horimi T, et al. Peritoneal lavage versus drainage for perforated appendicitis in children. *Surg Today*. 1995;25(3 CC-Anaesthesia CC-Child Health CC-Colorectal CC-Wounds):207-210. doi:10.1007/BF00311528
64. Thomson SR, Carle G, Reid TM, Davidson AI, Miller SS. Antibiotic prophylaxis in non-perforated appendicitis of childhood: tetracycline lavage compared with preoperative intravenous cefuroxime and metronidazole. *J Hosp Infect*. 1987;9(2 CC-HS-HANDSRCH CC-Anaesthesia CC-Child Health CC-Colorectal CC-Wounds):158-161. doi:10.1016/0195-6701(87)90054-5
65. Fujishiro J, Fujiogi M, Hirahara N, et al. Abdominal Drainage at Appendectomy for Complicated Appendicitis in Children. *Ann Surg*. 2021;274(6):e599-e604. doi:10.1097/SLA.0000000000003804
66. Kılıç ŞS, Ekinci S, Karnak İ, Çiftçi AÖ, Tanyel FC, Şenocak ME. Drainage Systems' Effect on Surgical Site Infection in Children with Perforated Appendicitis. *Ann Clin Anal Med*. 2016;07(05):591-594. doi:10.4328/JCAM.2865
67. Pettigrew RA. Delayed primary wound closure in gangrenous and perforated appendicitis. *Br J Surg*. 1981;68(9):635-638. doi:10.1002/bjs.1800680910
68. Ikeda H, Ishimaru Y, Takayasu H, Okamura K, Kisaki Y, Fujino J. Laparoscopic versus open appendectomy in children with uncomplicated and complicated appendicitis. *J Pediatr Surg*. 2004;39(11):1680-1685. doi:10.1016/j.jpedsurg.2004.07.018
69. Tsang TM, Tam PK, Saing H. Delayed primary wound closure using skin tapes for advanced appendicitis in children. A prospective, controlled study. *Arch Surg*. 1992;127(4 CC-Anaesthesia CC-Child Health CC-Colorectal CC-Wounds):451-453. doi:10.1001/archsurg.1992.01420040097017
70. Kato Y, Marusasa T, Ichikawa S, Lane GJ, Okazaki T, Yamataka A. Lapprotector™ Use Decreases Incisional Wound Infections in Cases of Perforated Appendicitis: A Prospective Study. *Asian J Surg*. 2008;31(3):101-103. doi:10.1016/S1015-9584(08)60068-8
71. Farach SM, Danielson PD, Walford NE, Harmel RP, Chandler NM. Same-day Discharge after Appendectomy Results in Cost Savings and Improved Efficiency. *Am Surg*. 2014;80(8):787-791. doi:10.1177/000313481408000829
72. Aguayo P, Alemayehu H, Desai AA, Fraser JD, St. Peter SD. Initial experience with same day discharge after laparoscopic appendectomy for nonperforated appendicitis. *J Surg Res*. 2014;190(1):93-97. doi:https://doi.org/10.1016/j.jss.2014.03.012
73. Putnam L, Levy S, Johnson E, et al. Same-Day Discharge for Simple Pediatric Appendicitis: Sustainable Quality Improvement Requires Ongoing Surveillance. *J Surg Res*. 2014;186(2):615. doi:10.1016/j.jss.2013.11.602
74. Litz CN, Stone L, Alessi R, Walford NE, Danielson PD, Chandler NM. Impact of outpatient management following appendectomy for acute appendicitis: An ACS NSQIP-P analysis. *J Pediatr Surg*. 2018;53(4):625-628. doi:10.1016/j.jpedsurg.2017.06.023
75. Newman K, Ponsky T, Kittle K, et al. Appendicitis 2000: variability in practice, outcomes, and resource utilization at thirty pediatric hospitals. *J Pediatr Surg*.

- 2003;38(3):372-379. doi:10.1053/jpsu.2003.50111
76. Rice-Townsend S, Barnes JN, Hall M, Baxter JL, Rangel SJ. Variation in Practice and Resource Utilization Associated With the Diagnosis and Management of Appendicitis at Freestanding Children's Hospitals: Implications for Value-Based Comparative Analysis. *Ann Surg*. 2014;259(6).
  77. Kashtan MA, Graham DA, Anandalwar SP, Hills-Dunlap JL, Rangel SJ. Variability, outcomes and cost associated with the use of parenteral nutrition in children with complicated appendicitis: A hospital-level propensity matched analysis. *J Pediatr Surg*. 2021;56(12):2299-2304. doi:10.1016/j.jpedsurg.2021.03.005
  78. Levin RA. *Food and Drug Administration*.; 2009.  
[https://www.accessdata.fda.gov/drugsatfda\\_docs/nda/2010/022382Orig1s000MedR.pdf](https://www.accessdata.fda.gov/drugsatfda_docs/nda/2010/022382Orig1s000MedR.pdf)
  79. Kotagal M, Hakkarainen TW, Simianu V V, Beck SJ, Alfonso-Cristancho R, Flum DR. Ketorolac Use and Postoperative Complications in Gastrointestinal Surgery. *Ann Surg*. 2016;263(1):71-75. doi:10.1097/SLA.0000000000001260
  80. Naseem H-R, Dorman RM, Ventro G, Rothstein DH, Vali K. Safety of perioperative ketorolac administration in pediatric appendectomy. *J Surg Res*. 2017;218:232-236. doi:10.1016/j.jss.2017.05.087
  81. Mazuski JE, Tessier JM, May AK, et al. The Surgical Infection Society Revised Guidelines on the Management of Intra-Abdominal Infection. *Surg Infect (Larchmt)*. 2017;18(1):1-76. doi:10.1089/sur.2016.261
  82. Mangram AJ, Horan TC, Pearson ML, Silver LC, Jarvis WR. Guideline for Prevention of Surgical Site Infection, 1999. Centers for Disease Control and Prevention (CDC) Hospital Infection Control Practices Advisory Committee. *Am J Infect Control*. 1999;27(2):97-132; quiz 133-134; discussion 96.
  83. Ban KA, Minei JP, Laronga C, et al. American College of Surgeons and Surgical Infection Society: Surgical Site Infection Guidelines, 2016 Update. *J Am Coll Surg*. 2017;224(1):59-74. doi:10.1016/j.jamcollsurg.2016.10.029
  84. Boomer LA, Cooper JN, Anandalwar S, et al. Delaying Appendectomy Does Not Lead to Higher Rates of Surgical Site Infections: A Multi-institutional Analysis of Children With Appendicitis. *Ann Surg*. 2016;264(1):164-168. doi:10.1097/SLA.0000000000001396



Figure 1: PRISMA flowchart

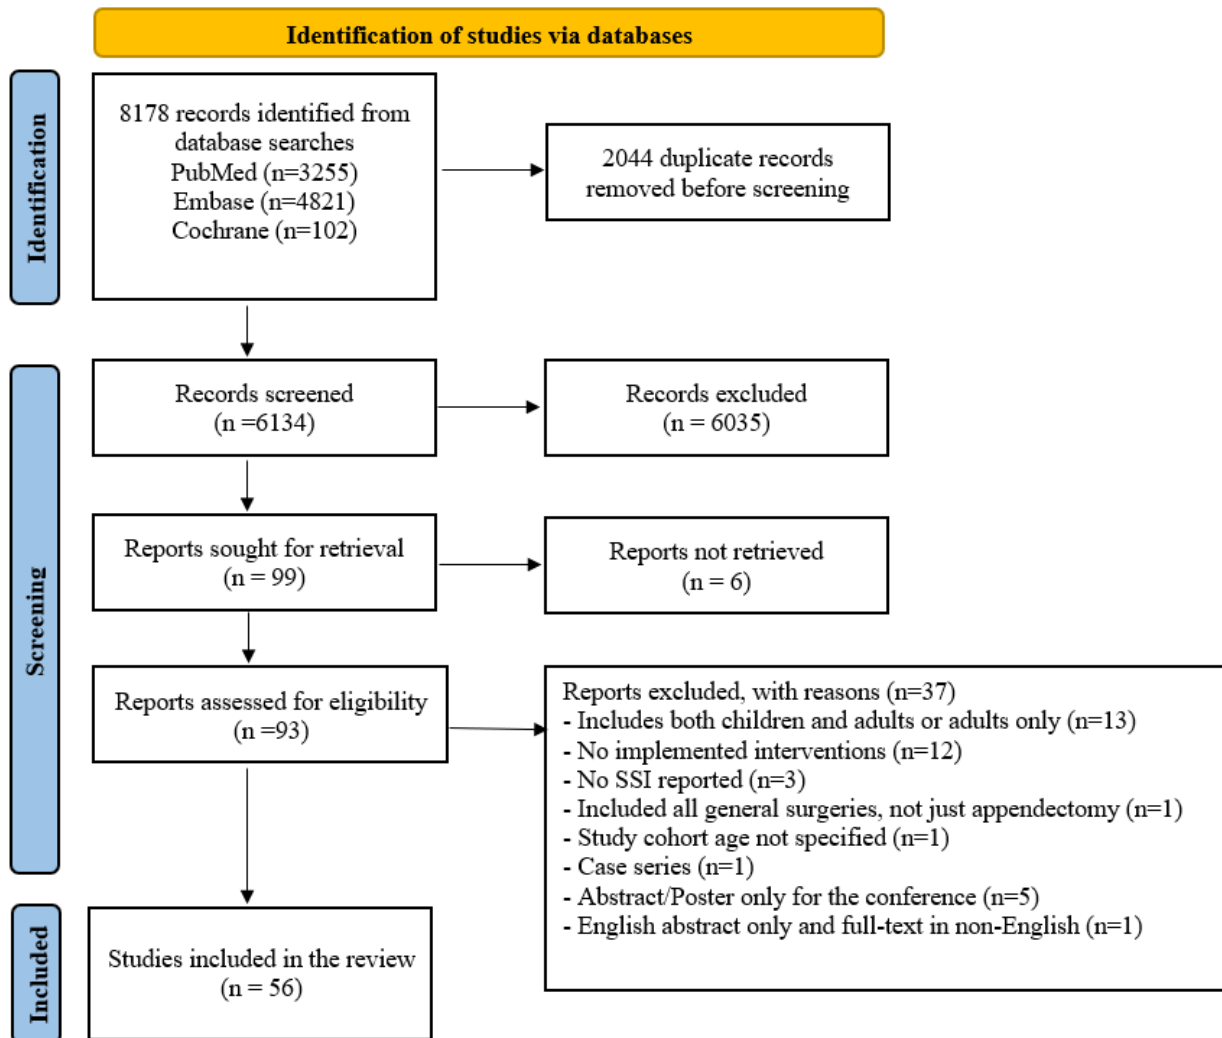

Table 1: Characteristics of included studies

| Study characteristics |                                          | n (%)     |
|-----------------------|------------------------------------------|-----------|
| Design                | Randomized controlled trials             | 13 (23.2) |
|                       | Prospective cohort study                 | 5 (8.9)   |
|                       | Retrospective cohort study               | 27 (48.2) |
|                       | Pre-post study                           | 11 (19.6) |
| Country               | United States                            | 33 (58.9) |
|                       | Japan                                    | 5 (8.9)   |
|                       | United Kingdom                           | 4 (7.1)   |
|                       | Turkey                                   | 4 (7.1)   |
|                       | Hong Kong                                | 2 (3.6)   |
|                       | South Africa                             | 2 (3.6)   |
|                       | Australia                                | 1(1.8)    |
|                       | Canada                                   | 1(1.8)    |
|                       | France                                   | 1(1.8)    |
|                       | Iran                                     | 1(1.8)    |
|                       | South Korea                              | 1(1.8)    |
|                       | Sweden                                   | 1(1.8)    |
| Type                  | Single center                            | 45 (80.4) |
|                       | Multi center                             | 11 (19.6) |
| Interventions         | Antibiotic stewardship                   | 18 (32.1) |
|                       | Clinical practice guidelines/pathways    | 12 (21.4) |
|                       | Surgical approach                        | 12 (21.4) |
|                       | Irrigation or lavage                     | 3 (5.4)   |
|                       | Use of peritoneal drains                 | 2 (3.6)   |
|                       | Timing of appendectomy                   | 4 (7.1)   |
|                       | Timing of wound closure and management   | 2 (3.6)   |
|                       | Outpatient management after appendectomy | 1 (1.8)   |
|                       | Parenteral nutrition                     | 1 (1.8)   |
|                       | Pain Management                          | 1 (1.8)   |

Table 2: Evidence table of included studies (n=56)

| First Author, Year, Country               | Study Design               | Type         | Sample size (n) | Intervention                                                                                                                                                                                                                                  | Relevant outcome measures and findings                                                                                                                           |
|-------------------------------------------|----------------------------|--------------|-----------------|-----------------------------------------------------------------------------------------------------------------------------------------------------------------------------------------------------------------------------------------------|------------------------------------------------------------------------------------------------------------------------------------------------------------------|
| <b>Antibiotic Stewardship</b>             |                            |              |                 |                                                                                                                                                                                                                                               |                                                                                                                                                                  |
| Anderson et al. <sup>31</sup> , 2018, USA | Retrospective cohort study | Multi center | 6412            | Discharged with or without home antibiotics                                                                                                                                                                                                   | The odds of post-discharge SSI was 45% greater in the home antibiotics group vs the no home antibiotics group (odds ratio 1.45; 95% CI 1.10 to 1.91; p<0.01)     |
| Arnold et al. <sup>29</sup> , 2018, USA   | RCT                        | Multi center | 82              | 10 days of intravenous (IV) ertapenem from the day of operation until discharge vs. IV ertapenem from the day of the operation and converted to oral amoxicillin-clavulanate on the day of discharge for a total antibiotic course of 10 days | There were no differences in the postoperative complications (wound infection (p=0.59) and abscess rate (p=0.71)                                                 |
| Cameron et al. <sup>15</sup> , 2018, USA  | Retrospective cohort study | Multi center | 1389            | piperacillin/tazobactam (extended spectrum) vs. cefoxitin or ceftriaxone with metronidazole (narrow spectrum)                                                                                                                                 | In the matched analysis, the rates of SSI were similar between groups [extended spectrum: 2.4% vs narrow-spectrum 1.8% (odds ratio, OR: 1.05, 95% CI 0.34-3.26)] |
| Cramm et al. <sup>22</sup> , 2023, USA    | Retrospective cohort study | Multi center | 3533            | Antibiotic (cefoxitin, ceftriaxone combined with metronidazole, and piperacillin-tazobactam) redosing within one hour of the incision                                                                                                         | Incisional SSI rates were similar between groups [redosed: 1.2% vs. non-redosed: 1.3%; OR 0.84, (95%,CI, 0.39-1.83)]                                             |

|                                               |                               |                  |     |                                                                                                                          |                                                                                                                                                                                                                                      |
|-----------------------------------------------|-------------------------------|------------------|-----|--------------------------------------------------------------------------------------------------------------------------|--------------------------------------------------------------------------------------------------------------------------------------------------------------------------------------------------------------------------------------|
| Dalgic et al. <sup>16</sup> ,<br>2014, Turkey | RCT                           | Single<br>center | 107 | Ertapenem vs.<br>Standard Triple<br>Antibiotic Therapy<br>(ampicillin,<br>gentamicin, and<br>metronidazole)              | Patients in the triple-<br>therapy group (5.6%)<br>developed wound<br>infections compared to two<br>(3.8%) wound infections in<br>the ertapenem ( $p > 0.05$ )                                                                       |
| Foster et al. <sup>17</sup> ,<br>1986, UK     | RCT                           | Single<br>center | 73  | Sulbactam and<br>ampicillin vs.<br>metronidazole and<br>cefotaxime                                                       | There were three (9%)<br>wound infections in the<br>group given sulbactam<br>and ampicillin and five<br>(14%) in the group given<br>metronidazole and<br>cefotaxime                                                                  |
| Hamdy et al. <sup>28</sup> ,<br>2019, USA     | Retrospective<br>cohort study | Single<br>center | 353 | Ceftriaxone plus<br>Metronidazole vs.<br>anti-pseudomonal<br>antibiotics within<br>the first two days<br>after admission | 2 total incisional infections,<br>0 in the anti-pseudomonal<br>group and 2 in the<br>ceftriaxone metronidazole                                                                                                                       |
| Foster et al. <sup>18</sup> ,<br>1987, UK     | RCT                           | Single<br>center | 100 | Sulbactam and<br>ampicillin (SA) vs.<br>metronidazole and<br>cefotaxime (MC)                                             | There was no difference in<br>infection rate between the<br>two antibiotic groups; there<br>were 3 wound infections<br>and one subphrenic abscess<br>in patients receiving SA<br>and 4 wound infections in<br>patients receiving MC. |
| Hutchinson et<br>al. <sup>19</sup> , 1983, UK | RCT                           | Single<br>center | 133 | Metronidazole<br>suppositories vs.<br>usual care                                                                         | There was no significant<br>difference in the incidence<br>or severity of wound<br>infection or post-operative<br>intra-abdominal sepsis<br>between the metronidazole-<br>treated and placebo groups<br>( $p > 0.1$ )                |
| Jen et al. <sup>32</sup> ,<br>2023, USA       | Retrospective<br>cohort study | Single<br>center | 363 | Discharged with or<br>without antibiotics                                                                                | Post-discharge organ-space<br>infections occurred in 4/86<br>(4.7%) of those with<br>antibiotics and 9/277<br>(3.2%) of those without<br>( $p = 0.54$ ). Superficial and                                                             |

|                                               |                            |               |     |                                                                                                                                        |                                                                                                                                                                                |
|-----------------------------------------------|----------------------------|---------------|-----|----------------------------------------------------------------------------------------------------------------------------------------|--------------------------------------------------------------------------------------------------------------------------------------------------------------------------------|
|                                               |                            |               |     |                                                                                                                                        | deep SSI occurred in 0/86 (0%) for those with antibiotics and 5/277 (1.8%) for those without ( $p = 0.21$ )                                                                    |
| Kashtan et al. <sup>21</sup> , 2021, USA      | Retrospective cohort study | Multi center  | 846 | Ceftriaxone plus Metronidazole vs. Cefoxitin                                                                                           | Ceftriaxone with metronidazole was associated with a 90% reduction in the odds of a SSI compared to cefoxitin [0.2% vs 2.7%; odds ratio: 0.10 (95% CI 0.02-0.60); $p = 0.01$ ] |
| Kizilcan, et al. <sup>23</sup> , 1992, Turkey | RCT                        | Single center | 100 | Prophylactic antibiotics (group 1 : no antibiotics, group 2: ornidazole, group 3: penicillin plus tobramycin and group 4: piperacillin | None of the patients had wound infection or intra-abdominal abscess.                                                                                                           |
| Litz et al. <sup>25</sup> , 2018, USA         | Retrospective cohort study | Single center | 478 | Last dose of antibiotics prior to incision: Group A (0–60 min before incision) and Group B (61–360 min before incision)                | There was no difference in the incidence of superficial SSI (A: 2.0% vs B: 2.1%, $p=1.0$ ) or intraabdominal abscess (A: 4.0% vs B: 3.6%, $p=0.81$ ).                          |
| Mennie et al. <sup>30</sup> , 2020, Australia | RCT                        | Single center | 243 | Two postoperative intravenous doses of placebo or antibiotics (intravenous cephalosporin and metronidazole )                           | A total of 9 postoperative wound infections occurred: 8/122 (6.6%) placebo versus 1/121 (0.8%) antibiotics, $p= 0.01$ [relative risk =7.9 (95% CI: 1.0-62.4)]                  |
| Nadler et al. <sup>20</sup> , 2003, USA       | Retrospective cohort study | Single center | 94  | Monotherapy (piperacillin-tazobactam) vs. Multi-Drug Therapy                                                                           | 1 patient in monotherapy and 3 patients in multidrug therapy developed SSI                                                                                                     |

|                                              |                          |               |      |                                                                                                                                                        |                                                                                                                                                                                                        |
|----------------------------------------------|--------------------------|---------------|------|--------------------------------------------------------------------------------------------------------------------------------------------------------|--------------------------------------------------------------------------------------------------------------------------------------------------------------------------------------------------------|
|                                              |                          |               |      | (Ampicillin, gentamicin, clindamycin or metronidazole)                                                                                                 |                                                                                                                                                                                                        |
| Somers et al. <sup>27</sup> , 2020, USA      | Prospective cohort study | Single center | 1549 | Timing and/or duration of preoperative and postoperative antibiotics (piperacillin-tazobactam or ciprofloxacin and metronidazole (in case of allergy ) | There was no statistically significant difference in SSI between the preoperative and postoperative antibiotics groups - piperacillin-tazobactam (p=0.31) and ciprofloxacin and metronidazole (p=0.36) |
| Seddik et al. <sup>24</sup> , 2021, USA      | Pre-post study           | Single center | 149  | Antimicrobial stewardship program to reduce piperacillin and tazobactam use                                                                            | There was no significant difference in the rate of surgical site infection (10% vs. 11%)                                                                                                               |
| Tsang et al. <sup>26</sup> , 1992, Hong Kong | RCT                      | Single center | 103  | Single preoperative dose of gentamicin and metronidazole vs. three doses of gentamicin and metronidazole given before and after the operation          | There was no significant difference between wound infection rates of the single-dose group (2.1%) and the three-dose group (1.8%)                                                                      |
| <b>Clinical practice guidelines/pathways</b> |                          |               |      |                                                                                                                                                        |                                                                                                                                                                                                        |
| Devin et al. <sup>33</sup> , 2020, USA       | Pre-post study           | Single center | 575  | A standardized pathway for same-day discharge and elimination of postoperative antibiotics                                                             | There was no significant increase in superficial SSI (2.6% vs 1.1%, p = 0.19), organ-space SSI (1.6% vs 0.4%, p = 0.14)                                                                                |
| Ferguson et al. <sup>37</sup> , 2021, USA    | Pre-post study           | Single center | 399  | Clinical practice guidelines (CPG) on the selection or duration of antibiotic therapy after appendectomy                                               | There was no significant relationship between CPG nonadherence and superficial or deep SSI (p=0.3) or intra-abdominal abscess (p=0.5)                                                                  |

|                                            |                            |               |      |                                                                                                                                                                                                                                 |                                                                                                                                                                                                                                                                    |
|--------------------------------------------|----------------------------|---------------|------|---------------------------------------------------------------------------------------------------------------------------------------------------------------------------------------------------------------------------------|--------------------------------------------------------------------------------------------------------------------------------------------------------------------------------------------------------------------------------------------------------------------|
| Khan et al. <sup>42</sup> ,<br>2020, USA   | Pre-post study             | Single center | 1289 | Treatment pathways were created to include specific guidelines regarding preoperative antibiotics, blood work, and imaging requirements                                                                                         | There was a significant decrease in surgical site infections (p = 0.01) in the post-protocol cohort                                                                                                                                                                |
| Lam et al. <sup>41</sup> ,<br>2021, Turkey | Retrospective cohort study | Single center | 276  | The clinical pathway included assessment and management of pediatric appendicitis, order sets to streamline care and recommendations on antibiotic duration                                                                     | There were no statistically significant differences in wound infection (simple appendicitis p=1.0; complicated appendicitis p=0.1) intra-abdominal abscess/phlegmon (complicated appendicitis p=1.0) in the pre and post-implementation group                      |
| Mueck et al. <sup>38</sup> ,<br>2017, USA  | Retrospective cohort study | Single center | 697  | Institutional protocol include the administration of both broad-spectrum antibiotics on the diagnosis of suspected appendicitis (simple and complicated) and pre-incisional prophylactic antibiotics within an hour of incision | Compliance with antibiotic spectrum with inappropriately narrow coverage was not significantly associated with SSI (OR=0.75 95% CI 0.09-6.03 p=0.79). Compliance with antibiotic timing (OR 0.22, 95% CI 0.06-0.87, p= 0.03) was significantly associated with SSI |
| Putnam et al. <sup>34</sup> ,<br>2014, USA | Pre-post study             | Single center | 1382 | Same-day discharge pathway                                                                                                                                                                                                      | Increased rate of SSI at time of first audit (1.6% vs 4.8%, p=.04) but returned to the pre pathway range at the time of the second audit (p=.08)                                                                                                                   |

|                                            |                          |               |      |                                                                                                                                                                                                                               |                                                                                                                                                                                                                                                                                                                                                 |
|--------------------------------------------|--------------------------|---------------|------|-------------------------------------------------------------------------------------------------------------------------------------------------------------------------------------------------------------------------------|-------------------------------------------------------------------------------------------------------------------------------------------------------------------------------------------------------------------------------------------------------------------------------------------------------------------------------------------------|
| Theodorou et al. <sup>35</sup> , 2022, USA | Pre-post study           | Single center | 113  | CPG to discontinue antibiotics on discharge in the presence of a normal white blood cell count (WBC) without neutrophilia                                                                                                     | There was a higher rate of post-discharge SSIs (1.8% pre vs. 9.3% post, $p = 0.03$ ). There was no significant association with CPG non-compliance and post-discharge SSI development. SSIs occurred in 3.6% of patients who were not CPG compliant ( $n = 3/84$ ) compared to 6.4% of patients who were compliant ( $n = 8/126$ , $p = 0.53$ ) |
| Wakeman et al. <sup>11</sup> , 2022, USA   | Pre-post study           | Single center | 274  | CPG included obtaining an intra-operative culture of purulent fluid, administering piperacillin/tazobactam for at least 72 hours post-operatively, and transitioning to oral antibiotics based on intraoperative culture data | There was a decline in post-operative SSIs after the implementation of the care pathway, the difference was not statistically significant (27% vs. 12%, $p=0.07$ )                                                                                                                                                                              |
| Willis et al. <sup>43</sup> , 2016, USA    | Prospective cohort study | Single center | 313  | CPG included standardization of the operative and postoperative management of complicated appendicitis                                                                                                                        | There was a significant decrease in the proportion of patients who had an organ-space SSI, from 24.1% in the pre-CPG group to 9.8% in the post-CPG group (RR, 0.41; 95% CI, 0.23-0.74). Superficial incisional and deep incisional SSIs were uncommon and no different between the groups ( $p>.99$ )                                           |
| Rossidis et al. <sup>36</sup> , 2020, USA  | Pre-post study           | Single center | 1562 | Protocol to discontinue                                                                                                                                                                                                       | There were no significant differences for SSIs                                                                                                                                                                                                                                                                                                  |



|                                                      |                            |               |     |                                                                                                                                                   |                                                                                                                                                             |
|------------------------------------------------------|----------------------------|---------------|-----|---------------------------------------------------------------------------------------------------------------------------------------------------|-------------------------------------------------------------------------------------------------------------------------------------------------------------|
|                                                      |                            |               |     | antibiotics after appendectomy for nonperforated appendicitis and of antibiotics upon discharge (no home antibiotics) for perforated appendicitis | between the preprotocol and postprotocol groups (p=0.37).                                                                                                   |
| Willis et al. <sup>39</sup> , 2018, USA              | Pre-post study             | Single center | 313 | Hospital-wide antimicrobial stewardship program (ASP) and clinical practice guideline (CPG) on antimicrobial utilization                          | There was a statistically significant decline in the incidence of SSIs during the combined implementation of ASP and CPG (p=0.007)                          |
| Van Coller et al. <sup>40</sup> , 2022, South Africa | Retrospective cohort study | Single center | 455 | Clinical protocol change from triple antibiotic (ampicillin, gentamycin, and metronidazole) vs. single agent (amoxicillin/clavulanic acid)        | There was a significantly lower (13.3%) SSI rate in the triple antibiotic group than in the single antibiotics group (22.7%) (p=0.048)                      |
| <b>Surgical Approach</b>                             |                            |               |     |                                                                                                                                                   |                                                                                                                                                             |
| Akkary et al. <sup>44</sup> , 2020, France           | Retrospective cohort study | Single center | 84  | Open appendectomy (OA) vs. laparoscopic appendectomy (LA)                                                                                         | The incidence of deep abscess formation was 3 times higher after LA versus OA; however, this was not statistically significant                              |
| Botchway et al. <sup>45</sup> , 2021, South Africa   | Retrospective cohort study | Single center | 81  | Open appendectomy vs. laparoscopic appendectomy                                                                                                   | In the OA group, 15.79% of the patients (n = 6) developed SSI vs 5.13% (n = 2) in the LA group, which was statistically significantly higher with P = 0.013 |

|                                              |                            |               |       |                                                                                                                          |                                                                                                                                                                                                               |
|----------------------------------------------|----------------------------|---------------|-------|--------------------------------------------------------------------------------------------------------------------------|---------------------------------------------------------------------------------------------------------------------------------------------------------------------------------------------------------------|
| Fujishiro et al. <sup>46</sup> , 2021, Japan | Retrospective cohort study | Multi center  | 4489  | Open vs. laparoscopic appendectomy                                                                                       | Surgical approach (laparoscopy/open) was not significantly associated with the development of superficial SSI (p=0.383), deep SSI (p=0.123) and organ space SSI (p=0.871)                                     |
| Groves et al. <sup>47</sup> , 2013, USA      | Retrospective cohort study | Single center | 289   | Open appendectomy vs. laparoscopic appendectomy                                                                          | There was a significantly lower rate of wound infection in LA (1.2 vs 8.9%, p= 0.017)                                                                                                                         |
| Ping et al. <sup>48</sup> , 2017, USA        | Retrospective cohort study | Single center | 398   | Open appendectomy vs. laparoscopic appendectomy                                                                          | A reduction in postoperative surgical wound infection (OR, 0.38; 95% CI, 0.18–0.81; p = .008) was noted in patients receiving LA compared with patients receiving OA                                          |
| Omling et al. <sup>49</sup> , 2021, Sweden   | Retrospective cohort study | Multi center  | 34808 | Open appendectomy vs. laparoscopic appendectomy                                                                          | Fewer infections occurred after laparoscopic appendectomy compared with open appendectomy (2.0 vs. 3.1%, adjusted OR: 0.65 [95% CI:0.54–0.79], p < 0.001                                                      |
| Han et al. <sup>50</sup> , 2022, South Korea | Retrospective cohort study | Single center | 270   | Hybrid appendectomy (HA) vs. single port laparoscopic appendectomy (SPLA) vs. multiport laparoscopic appendectomy (MPLA) | Wound-related complications (wound seroma and infection) were somewhat higher in the HA and SPLA groups than in the MPLA group (HA 6.3% versus SPLA 3.9% versus MPLA 1.8%) but were not significant (p=0.245) |
| Karam et al. <sup>51</sup> , 2016, USA       | Retrospective cohort study | Single center | 101   | Intracorporeal hybrid single port vs. conventional laparoscopic appendectomy                                             | One patient in the hybrid technique group had a surgical site infection (1.4%), and no patient in the 3-port group had any postoperative complication                                                         |

|                                               |                               |                  |     |                                                                                                                                                       |                                                                                                                                                                     |
|-----------------------------------------------|-------------------------------|------------------|-----|-------------------------------------------------------------------------------------------------------------------------------------------------------|---------------------------------------------------------------------------------------------------------------------------------------------------------------------|
| Lacher et al. <sup>54</sup> ,<br>2012, USA    | Prospective<br>cohort study   | Single<br>center | 415 | Single-incision<br>pediatric<br>endosurgery                                                                                                           | 11 patients developed<br>wound infection, and 13<br>patients developed intra-<br>abdominal abscess                                                                  |
| Safavi et al. <sup>55</sup> ,<br>2012, Canada | Retrospective<br>cohort study | Single<br>center | 247 | Endoloop vs.<br>endostapler closure<br>technique of the<br>appendiceal stump                                                                          | There was no significant<br>difference in rates of SSI<br>( $p=0.78$ )                                                                                              |
| Karam et al. <sup>51</sup> ,<br>2016, USA     | Retrospective<br>cohort study | Single<br>center | 625 | Transumbilical<br>laparoscopically<br>assisted<br>appendectomy<br>(TULAA) vs.<br>conventional 3-port<br>laparoscopic<br>appendectomy<br>(TPLA)        | SSI was slightly higher in<br>TULAA patients than in<br>the TPLA group (6% vs.<br>4%) but was not significant<br>( $p=0.19$ )                                       |
| Vejdan et al. <sup>52</sup> ,<br>2021, Iran   | RCT                           | Single<br>center | 210 | Open<br>appendectomy<br>(OA) vs.<br>laparoscopic<br>appendectomy (LA)<br>vs. Transumbilical<br>laparoscopically<br>assisted<br>appendectomy<br>(TULA) | TULA was associated with<br>a lower wound infection<br>rate (1 patient = 1.5%) than<br>was LA (3 patients = 5.2%)<br>and OA (7 patients = 9.8%)<br>( $p = 0.0035$ ) |

### Timing of appendectomy

|                                             |                               |                  |      |                                                                       |                                                                                                                                                                                                       |
|---------------------------------------------|-------------------------------|------------------|------|-----------------------------------------------------------------------|-------------------------------------------------------------------------------------------------------------------------------------------------------------------------------------------------------|
| Blakely et al. <sup>57</sup> ,<br>2011, USA | RCT                           | Single<br>center | 131  | Early<br>appendectomy vs.<br>Interval<br>appendectomy in<br>6-8 weeks | - No significant difference<br>in wound infection<br>- Increased abscess rate in<br>interval appendectomy<br>group                                                                                    |
| Boomer et al. <sup>59</sup> ,<br>2014, USA  | Retrospective<br>cohort study | Single<br>center | 1388 | Time from<br>diagnosis of<br>appendicitis to<br>operation             | SSI did not increase<br>significantly as the length<br>of time between emergency<br>department triage and<br>operation increased (all<br>patients, $p = 0.51$ ; simple<br>appendicitis (SA) patients, |

|                                           |                            |               |      |                                                                                                                                         |                                                                                                                                                                                                  |
|-------------------------------------------|----------------------------|---------------|------|-----------------------------------------------------------------------------------------------------------------------------------------|--------------------------------------------------------------------------------------------------------------------------------------------------------------------------------------------------|
|                                           |                            |               |      |                                                                                                                                         | $p = 0.91$ ; complex appendicitis (CA) patients, $p = 0.44$ ) or with increased time from admission to operation (all patients, $p = 0.99$ ; SA patients, $p = 0.69$ ; CA patients, $p = 0.96$ ) |
| Boomer et al. <sup>84</sup> , 2016, USA   | Retrospective cohort study | Multi center  | 1338 | Time to appendectomy                                                                                                                    | The risk of SSI did not significantly increase as the time between emergency department triage and appendectomy increased, or as the time from admission to appendectomy increased               |
| Gurien et al. <sup>58</sup> , 2016, USA   | Pre-post study             | Single center | 484  | Immediate and delayed appendectomy                                                                                                      | No statistically significant differences were found for SSIs in the nonperforated delayed versus immediate groups ( $p = 0.964$ )                                                                |
| <b>Irrigation or lavage</b>               |                            |               |      |                                                                                                                                         |                                                                                                                                                                                                  |
| Kubota et al. <sup>62</sup> , 2014, Japan | RCT                        | Single center | 44   | Peritoneal lavage with saline vs. strong acid electrolyzed water (SAEW)                                                                 | The incidence of SSI was significantly lower in SAEW group than in the saline group, at 0% vs. 20%, respectively ( $p < 0.05$ )                                                                  |
| Thomson et al. <sup>64</sup> , 1987, UK   | RCT                        | Single center | 84   | Preoperative intravenous doses of metronidazole and cefuroxime as an adjunct to oxytetracycline lavage vs. oxytetracycline lavage alone | Wound infection rates were not different between the two groups (2 vs 3).                                                                                                                        |
| Toki et al. <sup>63</sup> , 1995, Japan   | RCT                        | Single center | 53   | Peritoneal lavage using saline (lavage group) vs. silicon tube drainage (drainage)                                                      | Superficial wound infection was seen postoperatively in a total of eight children, two of whom were in the lavage group and six of whom were in the drainage group.                              |

### Use of peritoneal drains

|                                              |                            |               |      |                                                                                   |                                                                                                                                             |
|----------------------------------------------|----------------------------|---------------|------|-----------------------------------------------------------------------------------|---------------------------------------------------------------------------------------------------------------------------------------------|
| Fujishiro et al. <sup>65</sup> , 2021, Japan | Pre-post study             | Multi-center  | 1762 | With vs. without drainage placement at appendectomy                               | Drain placement was not associated with an incidence of superficial SSI (5.5% vs 7.6%, p=0.113) and organ space SSI (9.0% vs 8.7%, p=0.893) |
| Kilic et al. <sup>66</sup> , 2016, Turkey    | Retrospective cohort study | Single-center | 110  | Open suction drain (penrose drain) vs. closed suction drain (Jackson Pratt drain) | SSI rate was 15.7% in open suction and 7.5% in closed suction                                                                               |

### Timing of wound closure and management

|                                              |                          |               |    |                                                                                      |                                                                                                                                                                                                  |
|----------------------------------------------|--------------------------|---------------|----|--------------------------------------------------------------------------------------|--------------------------------------------------------------------------------------------------------------------------------------------------------------------------------------------------|
| Kato et al. <sup>70</sup> , 2008, Japan      | Prospective cohort study | Single center | 32 | With and without use of Lapprotector                                                 | -No significant differences in perforated vs. nonperforated appendicitis<br>- Significant difference in the wound infection in perforated appendicitis (p<0.05) with or without Lapprotector use |
| Tsang et al. <sup>69</sup> , 1992, Hong Kong | Prospective cohort study | Single center | 63 | Immediate wound closure vs. delayed wound closure in emergency appendectomy patients | No significant difference in the incidence of wound infection (21% vs. 24%).                                                                                                                     |

### Parenteral nutrition

|                                          |                            |              |      |                                                         |                                                                                                                                                          |
|------------------------------------------|----------------------------|--------------|------|---------------------------------------------------------|----------------------------------------------------------------------------------------------------------------------------------------------------------|
| Kashtan et al. <sup>77</sup> , 2021, USA | Retrospective cohort study | Multi Center | 1073 | High vs. low parenteral nutrition utilization hospitals | No differences were found between patients treated at high versus low PN utilization hospitals for SSIs (11.3% vs. 8.8%, OR: 0.72 [0.40,1.32], p = 0.29) |
|------------------------------------------|----------------------------|--------------|------|---------------------------------------------------------|----------------------------------------------------------------------------------------------------------------------------------------------------------|

### Pain management

|                                         |                            |             |       |                                                                   |                                                                                                                         |
|-----------------------------------------|----------------------------|-------------|-------|-------------------------------------------------------------------|-------------------------------------------------------------------------------------------------------------------------|
| Naseem et al. <sup>80</sup> , 2017, USA | Retrospective cohort study | Multicenter | 78296 | Ketorolac administration on the day of or day after the operation | no significant differences in the superficial (p=0.02), deep (p=0.17) and organ/space surgical site infections (p=0.31) |
|-----------------------------------------|----------------------------|-------------|-------|-------------------------------------------------------------------|-------------------------------------------------------------------------------------------------------------------------|

## Outpatient management after appendectomy

|                                          |                               |                 |     |                                                                                                                                             |                                                                                                                                                                                                                  |
|------------------------------------------|-------------------------------|-----------------|-----|---------------------------------------------------------------------------------------------------------------------------------------------|------------------------------------------------------------------------------------------------------------------------------------------------------------------------------------------------------------------|
| Litz et al. <sup>74</sup> ,<br>2018, USA | Retrospective<br>cohort study | Multi<br>center | 154 | Management of<br>uncomplicated<br>appendicitis<br>patients in the<br>emergency<br>department or<br>transferred to the<br>perioperative area | There was no significant<br>difference in the incidence<br>of superficial (1.9% vs<br>1.0%, p = 0.2), deep (0.6%<br>vs 0.1%, p = 0.17) or<br>organ/space surgical site<br>infections (1.3% vs 0.7%,<br>p = 0.31) |
|------------------------------------------|-------------------------------|-----------------|-----|---------------------------------------------------------------------------------------------------------------------------------------------|------------------------------------------------------------------------------------------------------------------------------------------------------------------------------------------------------------------|

---
